# Supplementary material
Source: PubMed Central journal article supplement (PMC3164580)

## Supporting Information

Supplementary Figure 1. (A) Secondary EB formed from Zap70KD and control mESCs were observed under a bright field microscope (B) Immunostaining for Oct4, c-Myc, Sox2, SSEA-1 and E-cadherin were performed on Zap70KD and control mESCs

Supplementary Figure 2. Phosphatase activity followed by immunoprecipitation of SHP-1 with whole cell protein lysate (input) from control mESC (Cont), Zap70KD (KD) and Zap70 KD transfected with Zap70 expressing plasmid (KD/over)

Supplementary Table 1. Teratoma forming efficiency of Zap70KD and control mESCs was analyzed 6 weeks after cell injection into four SCID/NOD mice

# Supplemental figure. 1

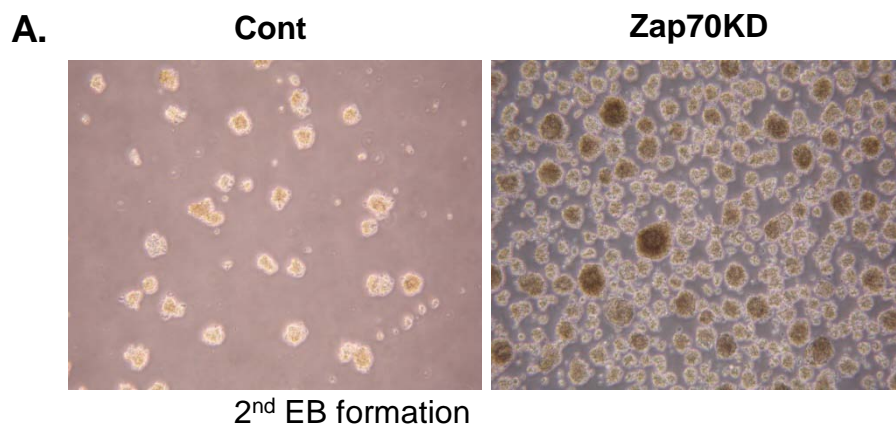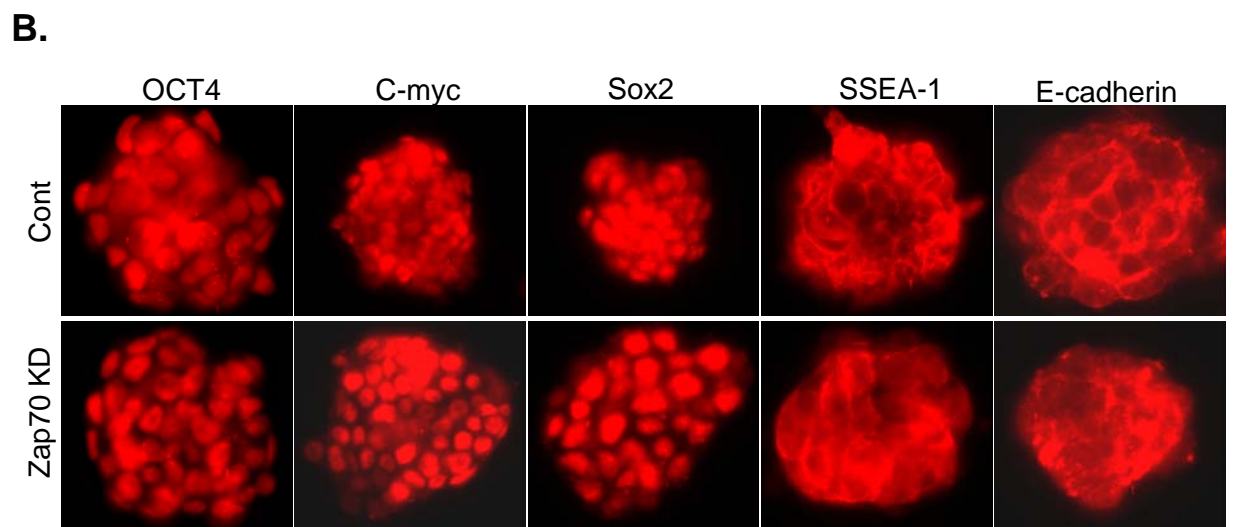

## Supplemental figure. 2

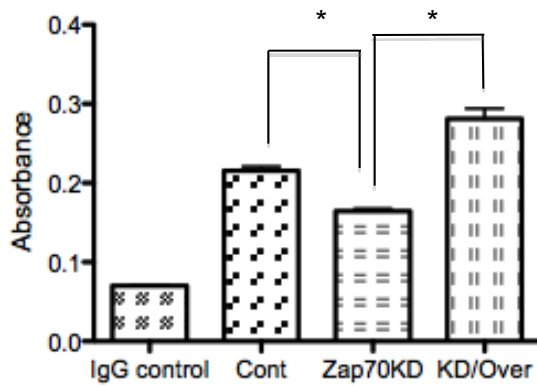

## Supplemental table. 1

|                                              | Teratoma Forming Efficiency |         |
|----------------------------------------------|-----------------------------|---------|
|                                              | Control                     | Zap70KD |
| No. of formed teratoma<br>/ No. of injection | 4/4                         | 1/4     |

# Addendum Figure. 1

**A.**

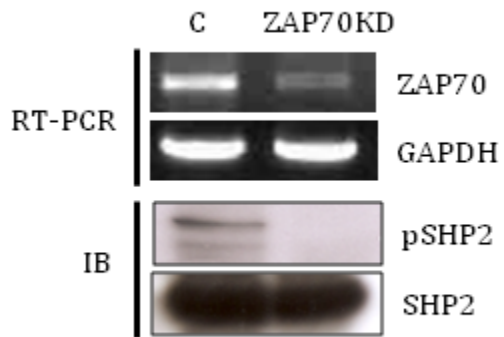

**B.**

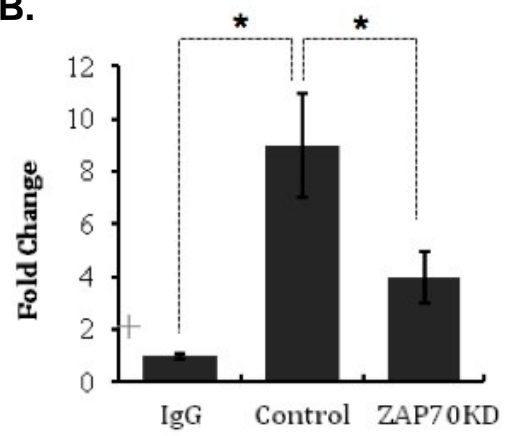

Supplement: NIHMS313175-supplement-01.pdf [file NIHMS313175-supplement-01.pdf]
